# Supplementary material
Source: HighWire-hosted journal article supplement (http://d2538ggaoe6cji.cloudfront.net/highwire/filestream/61495/field_highwire_adjunct_files/0/151431-1.pdf)

Trees = 755

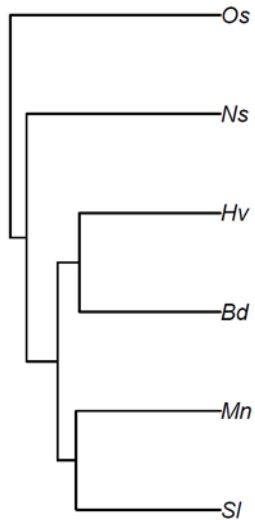

Trees = 434

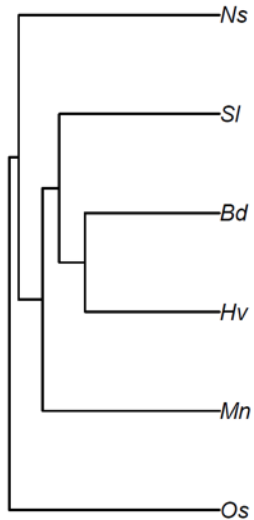

Trees = 281

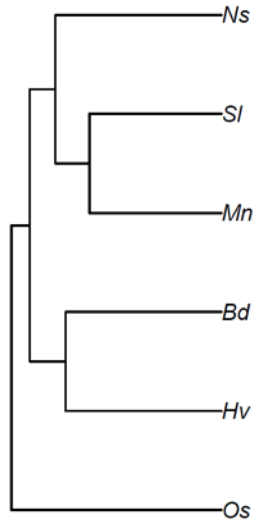

Trees = 271

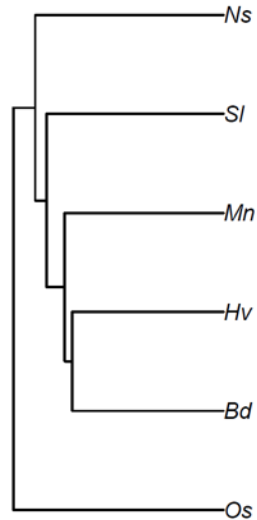

Supplement: 151431-1.pdf [file 151431-1.pdf]
